# Supplementary material
Source: PubMed Central journal article supplement (PMC7876615)
Supplement: jamapsychiatry-e204614-s001.pdf [file jamapsychiatry-e204614-s001.pdf]

## Supplementary Online Content

Mucci A, Galderisi S, Gibertoni D, et al; Italian Network for Research on Psychoses. Factors associated with real-life functioning in persons with schizophrenia in a 4-year follow-up study of the Italian Network for Research on Psychoses. *JAMA Psychiatry*. Published online February 10, 2021. doi:10.1001/jamapsychiatry.2020.4614

**eAppendix 1.** Methods

**eAppendix 2.** Results of Control Analyses

**eTable 1.** Sociodemographic and Clinical Characteristics of the Study Population at Baseline (N=618)

**eTable 2.** Within-Subject Comparisons of Follow-up Versus Baseline Characteristics

**eTable 3.** Initial Structural Equation Model (SEM)

**eTable 4.** Direct and Indirect Effects of Baseline Variables on the Three Real-Life Functioning Domains at t0 (Within t0 Effects) Estimated in the Final Structural Equation Model

**eTable 5.** Split Sample Cross-Validation of the Final Structural Equation Model (SEM): Standardized Coefficients of the Effects of Baseline Variables on the Three Real-Life Functioning Domains at Follow-up in the Training and Test Samples

**eTable 6.** Control Analysis for the Site Effect

**eTable 7.** Multiple Linear Regression of Work Skills at Follow-up on Variables Used in the Structural Equation Model and Physical and Psychiatric Comorbidities

**eTable 8.** Multiple Linear Regression of Everyday Life Skills at Follow-up on Variables Used in the Structural Equation Model and Physical and Psychiatric Comorbidities

**eTable 9.** Multiple Linear Regression of Interpersonal Relationships at Follow-up on Variables Used in the Structural Equation Model and Physical and Psychiatric Comorbidities

**eTable 10.** Initial Latent Change Score Model

**eReferences.**

This supplementary material has been provided by the authors to give readers additional information about their work.

## **eAppendix 1. Methods**

### **Exclusion criteria**

The exclusion criteria were: a) a history of head trauma with loss of consciousness in the 4 years between baseline and follow-up assessments; b) progressive cognitive deterioration possibly due to dementia or other neurological illness diagnosed in the last 4 years; c) a history of alcohol and/or substance abuse in the last 6 months; d) current pregnancy or lactation; e) inability to provide an informed consent, and f) treatment modifications and/or hospitalization due to symptom exacerbation in the last 3 months.

### **Study assessment procedures**

All subjects and their caregivers were both interviewed and tested, and no data were reconstructed only from clinical records, which were consulted as a further source of information on hospitalizations or changes in pharmacological therapy from baseline to follow-up.

Enrolled patients completed the assessments in three days, following the same schedule used in the cross-sectional investigation<sup>1</sup>: 1) collection of socio-demographic information; psychopathological and neurological assessments on the first day; 2) neurocognitive, social cognition and functional capacity assessments on the second day; 3) assessment of personal resources and perceived stigma on the third day in the morning, or in the afternoon of any of the days, according to the patient's preference.

For real-life functioning assessment, the patient's key caregiver, preferably the same interviewed in the cross-sectional investigation, was invited to join one of the scheduled sessions.

### Evaluation of illness-related factors

A clinical form was filled in with information on disease course and treatments in the previous 4 years, using all available sources (patients, relatives, medical records and mental health workers).

The Positive and Negative Syndrome Scale (PANSS)<sup>2</sup> was used to rate the dimensions “disorganization” and “positive symptoms”, in agreement to the consensus 5-factor solution proposed by Wallwork et al<sup>3</sup>. For both dimensions, higher scores represent greater symptom severity.

Negative symptoms were assessed using the Brief Negative Symptom Scale (BNSS)<sup>4,5</sup>.

The scores of the two domains Avolition (sum of anhedonia, asociality and avolition) and Expressive deficit (sum of blunted affect and alogia) were used in statistical analyses (higher scores correspond to greater severity).

Depressive symptoms were evaluated by the Calgary Depression Scale for Schizophrenia (CDSS)<sup>6</sup>; the total score was used in data analyses (higher scores correspond to greater severity of depression). Extrapyramidal symptoms – i.e., hyperkinesia, parkinsonism, akathisia and dystonia – were assessed by means of the St. Hans Rating Scale (SHRS)<sup>7</sup> (higher scores represent greater symptom severity).

The Measurement and Treatment Research to Improve Cognition in Schizophrenia (MATRICS) Consensus Cognitive Battery (MCCB)<sup>8,9</sup> was used to assess the following

neurocognitive domains: processing speed, attention/vigilance, working memory, verbal learning, visual learning, social cognition, and reasoning and problem solving (for all domains, higher scores represent better cognitive functioning). The assessment of social cognition, partly included in the MCCB (Mayer-Salovey-Caruso Emotional Intelligence Test, MSCEIT, managing emotion section), was integrated by the Facial Emotion Identification Test (FEIT)<sup>10</sup>, measuring emotion recognition, and The Awareness of Social Inference Test (TASIT)<sup>11</sup>, assessing theory of mind. For each social cognition test, higher scores correspond to better cognitive functioning.

Psychiatric comorbidities were assessed using the Structured Clinical Interview for DSM-IV - Patient Version (SCID-I/P)<sup>12</sup>. Physical comorbidities were evaluated using the Physical Health Inventory<sup>13</sup>, which explores the presence of the following physical conditions: Metabolic syndrome; Arteriosclerotic heart disease; Diabetes; Serious respiratory disorder; Obesity; Arthritis; Hearing impairment; Speech impairment; Parkinson's disease; Tardive dyskinesia; Cancer of a major organ or system.

#### Assessment of personal resources

The Resilience Scale for Adults (RSA)<sup>14</sup>, a self-administered scale, was used to assess perception of self, perception of the future, social competence, and family cohesion (higher scores correspond to higher resilience).

The Service Engagement Scale (EnS)<sup>15</sup> measured patients' levels of difficulty to engage with mental health services (higher total score represents greater difficulty).

### Evaluation of context-related factors

The Internalized Stigma of Mental Illness (ISMI)<sup>16</sup> questionnaire evaluated the experience of internalized stigma (higher total score corresponds to greater experience of internalized stigma).

The number of available incentives was registered as a count variable, ranging from 0 to 4, and included the availability of a disability pension, access to family practical and financial support, and registration in the unemployment list.

### Assessment of functional capacity and real-life functioning

The short version of the University of California San Diego (UCSD) Performance-based Skills Assessment Brief (UPSA-B)<sup>17</sup> was used to assess functional capacity. The total score was used (higher score corresponds to better capacity).

Real-life functioning was evaluated using the Specific Level of Functioning Scale (SLOF)<sup>18</sup>, an instrument assessing several aspects of functioning, based on the key caregiver's judgment on behavior and functioning of the patient. SLOF domains "Interpersonal relationships", "Everyday life skills" and "Work skills" were included in statistical analyses. For each domain, higher score corresponds to better real-life functioning.

### Training of researchers and inter-rater reliability

Researchers were trained by the coordinating center 2 months before the beginning of the follow-up recruitment, to ensure consistency with the baseline data collection procedures.

For each assessment domain (illness-related factors, personal resources and context-related factors), at least one researcher per site was trained. In order to avoid halo effects, the same researcher could not be trained in more than one assessment area.

The inter-rater reliability was evaluated by Cohen's kappa for categorical variables, and intraclass correlation coefficient (ICC) for continuous variables. For items showing a small degree of variation among patients, the percentage of perfect agreement was calculated.

An excellent inter-rater agreement was found for the SCID-I-P (Cohen's kappa=0.91). Good to excellent agreement was observed for SLOF (ICC=0.58-1, percentage agreement=70-100%), BNSS (ICC=0.74-0.97), PANSS (ICC=0.60-0.98, percentage agreement=64-100%), CDSS (ICC=0.76-0.98) and MCCB (ICC=0.98).

### **Details on structural equation modeling (SEM) and latent change score (LCS) modeling**

In both the SEM and LCS, baseline neurocognition and social cognition were expressed as latent variables, i.e., linear composites of the individual cognitive domain scores, while real-life functioning and the other independent variables were used as observed variables.

#### **SEM**

An initial SEM included all possible relationships between the three domains of functioning at  $t_1$  and all the other variables at  $t_0$  (eTable 3). The final model was obtained by removing non-significant relationships, and adding new clinically grounded significant relationships suggested by modification indices. Correlations between

residuals were added to the SEM only for variables belonging to the same construct and with  $r \geq 0.15$ , to avoid over-parameterization of the model while adding only little information and model fit improvement.

The internal consistency of the three scales of functioning was very high, both at  $t_0$  and  $t_1$  (Cronbach's alpha ranging from 0.880 to 0.917 and 0.891 to 0.944, respectively), thus enabling the use of the observed variables without adjusting for intrasubject unreliability<sup>19</sup>.

### LCS

In an LCS model, the difference between baseline and follow-up is defined, for each specified domain, by a latent change variable. Latent change variables are related to their own baseline values through an autoregressive parameter, and to the baseline values of the other domains by a regression coefficient (cross-domain coupling) which captures the extent to which change in one domain depends on the baseline level in the other.

LCS modeling requires the measurement invariance of latent domains to ensure that the latent constructs are measured in the same way at the two time-points<sup>20</sup>; therefore, we constrained the factor loadings, residual variances and items intercepts of neurocognition and social cognition at follow-up to be equal to those estimated at baseline. Correlations among the baseline variables and among the latent change variables were also estimated, to investigate the degree of co-occurrence of changes, after adjusting for cross-domain couplings. Statistics relevant to the initial LCS model are reported in eTable 10.

For correlation coefficients, the p-value in large samples tends to be significant even for weak associations, thus these coefficients were interpreted based on their absolute value:

coefficients from 0.10 to 0.30 were interpreted as indicative of weak correlations, from 0.30 to 0.49 as moderate correlations, from 0.50 to 1 as strong correlations<sup>21</sup>.

### Further details

In both SEM and LCS models, neurocognition, social cognition and functional capacity were standardized with respect to the Italian normative database. Real-life functioning and the independent variables were used as z-scores in the SEM, while in LCS their original metrics were maintained.

### **Control analyses**

The model fit and association consistency of the final SEM was tested in two random equal size subsamples (N=309), i.e., a training and a test subsample.

To test for a possible effect of the center (N=24), goodness of fit of the model was repeatedly tested in subsamples obtained by excluding sequentially from 1 to 14 centers, starting from the one with the largest number of recruited patients, thus progressively reducing the number of patients included in the analysis from 572 to 180.

We also tested the effect of treatment by checking goodness of fit of the model in a homogeneous subsample treated with second-generation antipsychotics only.



## **eAppendix 2. Results of Control Analyses**

The results of control analyses run to test for potential SEM overfitting and site effect are reported hereafter.

The first analysis (eTable 5) showed that, in the training subsample, the fit of the final SEM was good: RMSEA=0.044 (95% CI: 0.037-0.051); CFI=0.941; TLI=0.930. A few associations were no more significant, namely those between available incentives and everyday life skills at follow-up, and between neurocognition and work skills at follow-up. For the latter association, the regression coefficient changed only slightly (from 0.101 to 0.094), but became non-significant because of the reduced sample size. Therefore, it was retained in the SEM run in the test subsample. In this latter subsample, the fit of the model was very good: RMSEA=0.034 (95% CI: 0.025-0.043); CFI=0.967; TLI=0.961. The associations of baseline positive symptoms and social cognition with work skills at follow-up lost statistical significance. However, variations in the level of significance were regarded as most likely due to the reduced sample size.

The control analysis testing for a possible site effect (eTable 6) revealed no change in the model goodness of fit obtained in the total sample when excluding up to 14 centers from the analysis.

The goodness of fit of the model was also confirmed in the subsample of subjects treated with second-generation antipsychotics only (n=441): RMSEA=0.037 (95% CI: 0.031-0.043); CFI=0.958; TLI=0.950.

**eTable 1. Sociodemographic and Clinical Characteristics of the Study Population at Baseline (N=618)**

| <b>Variable (N. available observations)</b> | <b>Mean±SD or<br/>n (%)</b> | <b>Min; Max</b> |
|---------------------------------------------|-----------------------------|-----------------|
| Age                                         | 40.4 ± 10.5                 | 18; 66          |
| Male gender                                 | 427 (69.1)                  |                 |
| Education (years, 616)                      | 11.7 ± 3.4                  | 5; 22           |
| Working (596)                               | 174 (29.2)                  |                 |
| Living arrangement (615)                    |                             |                 |
| Alone                                       | 82 (13.3)                   |                 |
| Married/in a partnership                    | 58 (9.4)                    |                 |
| Parents/relatives                           | 365 (59.4)                  |                 |
| Community/friends                           | 80 (13.0)                   |                 |
| Other                                       | 30 (4.9)                    |                 |
| Stable affective relationships (615)        | 92 (14.9)                   |                 |
| Legal problems                              | 52 (8.4)                    |                 |
| Pharmacological treatment                   |                             |                 |
| First-generation antipsychotics             | 92 (14.9)                   |                 |
| Second-generation antipsychotics            | 432 (69.9)                  |                 |
| Both                                        | 84 (13.6)                   |                 |
| None                                        | 10 (1.6)                    |                 |

**eTable 2. Within-Subject Comparisons of Follow-up Versus Baseline Characteristics**

| <b>Variable (N. available observations)</b>                           | <b>Baseline</b> | <b>Follow-up</b> | <b>Test (McNemar/t);<br/>p</b> |
|-----------------------------------------------------------------------|-----------------|------------------|--------------------------------|
| Education (N=615); years, mean±SD                                     | 11.76±0.13      | 11.72±0.14       | -0.65; .51                     |
| Supported housing (N=611), N (%)                                      | 76 (12.4)       | 62 (10.1)        | 4.67; .03                      |
| Working (N=588); N (%)                                                | 170 (28.9)      | 208 (35.4)       | 12.0; <.001                    |
| Stable affective relationships (N=610); N (%)                         | 92 (15.1)       | 115 (18.8)       | 8.40; .004                     |
| Presence of legal problems (N=612); N (%)                             | 52 (8.5)        | 8 (1.3)          | 37.2; <.001                    |
| Subjects treated with second-generation antipsychotics (N=618); N (%) | 432 (69.9)      | 441 (71.4)       | 0.61; .43                      |

**eTable 3. Initial Structural Equation Model (SEM)**

| Baseline variables          | Everyday life skills at follow-up   | Interpersonal relationships at follow-up | Work skills at follow-up            | Everyday life skills at baseline       | Interpersonal relationships at baseline | Work Skills at baseline                | Social cognition                       | Functional capacity                    | Resilience                              | Stigma                                 | Engagement with services               |
|-----------------------------|-------------------------------------|------------------------------------------|-------------------------------------|----------------------------------------|-----------------------------------------|----------------------------------------|----------------------------------------|----------------------------------------|-----------------------------------------|----------------------------------------|----------------------------------------|
| Everyday life skills        | 0.462<br>(0.383;<br>0.541)<br><.001 | -0.026<br>(-0.122;<br>0.070)<br>.60      | 0.164<br>(0.076;<br>0.252)<br><.001 |                                        |                                         |                                        | -                                      |                                        | -                                       |                                        | -                                      |
| Interpersonal relationships | 0.019<br>(-0.053;<br>0.091)<br>.60  | 0.332<br>(0.252;<br>0.413)<br><.001      | -0.015<br>(-0.091;<br>0.062)<br>.70 |                                        |                                         |                                        | -                                      |                                        | -                                       |                                        | -                                      |
| Work skills                 | 0.036<br>(-0.040;<br>0.113)<br>.35  | 0.065<br>(-0.023;<br>0.154)<br>.15       | 0.283<br>(0.203;<br>0.362)<br><.001 |                                        |                                         |                                        | -                                      |                                        | -                                       |                                        | -                                      |
| Neurocognition              | 0.238<br>(0.113;<br>0.362)<br><.001 | 0.068<br>(-0.076;<br>0.212)<br>.36       | 0.093<br>(-0.039;<br>0.225)<br>.17  | 0.038<br>(-0.095;<br>0.170)<br>.58     | -0.118;<br>(-0.266;<br>0.031)<br>.12    | 0.052<br>(-0.089;<br>0.193)<br>.47     | 0.624<br>(0.551;0.697)<br><.001        | 0.570<br>(0.504;<br>0.636)<br><.001    | -                                       | -0.214<br>(-0.294;<br>-0.133)<br><.001 | -0.218<br>(-0.301;<br>-0.135)<br><.001 |
| Social cognition            | -0.026<br>(-0.144;<br>0.092)<br>.67 | 0.120<br>(-0.014;<br>0.254)<br>.08       | 0.148<br>(0.023;<br>0.272)<br>.02   | 0.125<br>(0.002;<br>0.248)<br>.05      | 0.206<br>(0.069;<br>0.343)<br>.003      | 0.131<br>(0.000;<br>0.262)<br>.05      | -                                      |                                        | -                                       |                                        | -                                      |
| Avolition                   | 0.042<br>(-0.028;<br>0.112)<br>.24  | -0.108<br>(-0.189;<br>-0.026)<br>.009    | -0.002<br>(-0.077;<br>0.073)<br>.96 | -0.078<br>(-0.149;<br>-0.006)<br>.03   | -0.336<br>(-0.413;<br>-0.260)<br><.001  | -0.160<br>(-0.236;<br>-0.084)<br><.001 | -                                      |                                        | -0.171<br>(-0.251; -<br>0.091)<br><.001 | 0.191<br>(0.115;<br>0.267)<br><.001    | 0.040<br>(-0.038;<br>0.118)<br>.32     |
| Disorganization dimension   | -0.050<br>(-0.133;<br>0.034)<br>.24 | -0.005<br>(-0.102;<br>0.092)<br>.92      | -0.053<br>(-0.141;<br>0.036)<br>.24 | -0.209<br>(-0.296;<br>-0.122)<br><.001 | 0.003<br>(-0.096;<br>0.101)<br>.96      | -0.126<br>(-0.220;<br>-0.033)<br>.008  | -0.211<br>(-0.290;<br>-0.133)<br><.001 | -0.190<br>(-0.260;<br>-0.120)<br><.001 |                                         |                                        |                                        |
| Positive dimension          | -0.003<br>(-0.073;<br>0.066)<br>.92 | -0.069<br>(-0.149;<br>0.012)<br>.09      | -0.063<br>(-0.137;<br>0.011)<br>.09 | -0.076<br>(-0.150; -<br>0.002)<br>.04  | -0.013<br>(-0.096;<br>0.069)<br>.75     | -0.086<br>(-0.165;<br>-0.007)<br>.03   | -                                      |                                        | -                                       |                                        | 0.147<br>(0.069;<br>0.224)<br><.001    |
| Functional capacity         | 0.053<br>(-0.034;                   | -0.030<br>(-0.131;                       | 0.003<br>(-0.090;                   | 0.249<br>(0.159;                       | 0.030<br>(-0.072;                       | 0.147<br>(0.050;                       |                                        |                                        |                                         |                                        |                                        |

|                          |                                     |                                     |                                     |                                       |                                       |                                        |   |  |                                        |  |   |
|--------------------------|-------------------------------------|-------------------------------------|-------------------------------------|---------------------------------------|---------------------------------------|----------------------------------------|---|--|----------------------------------------|--|---|
|                          | 0.141)<br>.23                       | 0.070)<br>.56                       | 0.095)<br>.96                       | 0.340)<br><.001                       | 0.132)<br>.56                         | 0.244)<br>.003                         |   |  |                                        |  |   |
| Stigma                   |                                     |                                     |                                     |                                       |                                       |                                        |   |  | -0.549<br>(-0.618;<br>-0.480)<br><.001 |  |   |
| Resilience               | 0.028<br>(-0.044;<br>0.100)<br>.44  | 0.055<br>(-0.029;<br>0.138)<br>.20  | 0.034<br>(-0.043;<br>0.110)<br>.39  | 0.018<br>(-0.059;<br>0.094)<br>.65    | 0.135<br>(0.049;<br>0.222)<br>.002    | 0.039<br>(-0.043;<br>0.120)<br>.35     |   |  |                                        |  |   |
| Engagement with services | -0.027<br>(-0.090;<br>0.035)<br>.39 | -0.015<br>(-0.087;<br>0.057)<br>.68 | -0.060<br>(-0.126;<br>0.006)<br>.08 | -0.100<br>(-0.167;<br>-0.033)<br>.003 | -0.081<br>(-0.155;<br>-0.007)<br>.031 | -0.069<br>(-0.140;<br>0.003)<br>.06    |   |  |                                        |  |   |
| Number of incentives     | 0.070<br>(0.010;<br>0.131)<br>.02   | 0.051<br>(-0.020;<br>0.121)<br>.16  | -0.004<br>(-0.068;<br>0.061)<br>.91 | -0.109<br>(-0.174;<br>-0.045)<br>.001 | -0.066<br>(-0.138;<br>0.005)<br>.07   | -0.136<br>(-0.205;<br>-0.067)<br><.001 | - |  | -                                      |  | - |

Table cells: standardized regression coefficient; 95% confidence intervals (in brackets); p-value

**eTable 4. Direct and Indirect Effects of Baseline Variables on the Three Real-Life Functioning Domains At t<sub>0</sub> (Within t<sub>0</sub> Effects)  
Estimated in the Final Structural Equation Model**

|                           | Real-life functioning domains at baseline |                                  |                                  |                                 |                                  |                                 |
|---------------------------|-------------------------------------------|----------------------------------|----------------------------------|---------------------------------|----------------------------------|---------------------------------|
|                           | Everyday life skills                      |                                  | Interpersonal relationships      |                                 | Work skills                      |                                 |
|                           | Direct effects                            | Indirect effects                 | Direct effects                   | Indirect effects                | Direct effects                   | Indirect effects                |
| Neurocognition            | -                                         | 0.270 (0.213; 0.328)<br><.001    | -                                | 0.120 (0.068; 0.171)<br><.001   | -                                | 0.220 (0.160; 0.279)<br><.001   |
| Social cognition          | 0.150 (0.060; 0.240)<br><.001             | -                                | 0.140 (0.060; 0.220)<br>.001     | -                               | 0.172 (0.076; 0.269)<br><.001    | -                               |
| Functional capacity       | 0.266 (0.190; 0.341)<br><.001             | -                                | -                                | -                               | 0.166 (0.057; 0.248)<br><.001    | -                               |
| Incentives                | -0.093 (-0.154; -0.031)<br>.003           | -                                | -                                | -                               | -0.122 (-0.189; -0.055)<br><.001 | -                               |
| Avolition                 | -0.086 (-0.153; -0.018)<br>.013           | -                                | -0.346 (-0.418; -0.274)<br><.001 | -0.037 (-0.066; -0.008)<br>.011 | -0.175 (-0.247; -0.104)<br><.001 | -                               |
| Positive dimension        | -0.071 (-0.141; -0.002)<br>.04            | -0.015 (-0.028; -0.003)<br>.02   | -                                | -0.012 (-0.025; 0.001)<br>.06   | -0.082 (-0.158; -0.006)<br>.03   | -0.011 (-0.023; 0.001)<br>.08   |
| Disorganization dimension | -0.207 (-0.289; -0.124)<br><.001          | -0.081 (-0.110; -0.052)<br><.001 | -                                | -0.013 (-0.038; 0.012)<br>.32   | -0.121 (-0.211; -0.031)<br>.008  | -0.067 (-0.094; 0.040)<br><.001 |
| Resilience                | -                                         | -                                | 0.114 (0.034; 0.195)<br>.005     | -                               | -                                | -                               |

|                          |                                    |   |                                   |                                |                                   |   |
|--------------------------|------------------------------------|---|-----------------------------------|--------------------------------|-----------------------------------|---|
| Stigma                   | -                                  | - | -                                 | -0.065 (-0.111; 0.018)<br>.006 | -                                 | - |
| Engagement with Services | -0.102<br>(-0.169; -0.036)<br>.003 | - | -0.080<br>(-0.152; -0.007)<br>.03 | -                              | -0.072<br>(-0.143; -0.001)<br>.05 | - |

Table cells: standardized regression coefficients; 95% confidence intervals (in brackets); p-values

**eTable 5. Split Sample Cross-Validation of the Final Structural Equation Model (SEM): Standardized Coefficients of the Effects of Baseline Variables on the Three Real-Life Functioning Domains at Follow-up in the Training and Test Samples**

| A) TRAINING sample<br>(n=309) | Real-life functioning domains at follow-up |                                    |                                 |                                 |                                |                                 |
|-------------------------------|--------------------------------------------|------------------------------------|---------------------------------|---------------------------------|--------------------------------|---------------------------------|
|                               | Everyday life skills                       |                                    | Interpersonal relationships     |                                 | Work skills                    |                                 |
| Baseline variable             | Direct effect<br>Estimate (p)              | Indirect<br>effect<br>Estimate (p) | Direct effect<br>Estimate (p)   | Indirect effect<br>Estimate (p) | Direct effect<br>Estimate (p)  | Indirect effect<br>Estimate (p) |
| Avolition                     | -                                          | -                                  | -0.129 (-0.221;<br>-0.037) .006 | -                               | -                              | -                               |
| Disorganization dimension     | -                                          | -                                  | -                               | -0.053 (-0.088;<br>-0.017) .004 | -                              | -0.057 (-0.100;<br>-0.014) .01  |
| Positive dimension            | -                                          | -                                  | -                               | -                               | -0.079 (-0.153;<br>-0.005) .04 | -                               |
| Neurocognition                | 0.289 (0.195; 0.383)<br><.001              | -                                  | -                               | 0.125 (0.056; 0.194)<br><.001   | 0.094 (-0.036;<br>0.225) .15   | 0.135 (0.047;<br>0.222) .003    |
| Available incentives          | -                                          | -                                  | -                               | -                               | -                              | -                               |
| Engagement with services      | -                                          | -                                  | -                               | -                               | -                              | -                               |
| Social cognition              | -                                          | -                                  | 0.206 (0.100;<br>0.312) <.001   | -                               | 0.223 (0.086;<br>0.360) .001   | -                               |
| Functional capacity           | -                                          | -                                  | -                               | -                               | -                              | -                               |
| Stigma                        | -                                          | -                                  | -                               | -                               | -                              | -                               |
| Resilience                    | -                                          | -                                  | -                               | -                               | -                              | -                               |
| Everyday life skills          | 0.505 (0.427; 0.583)<br><.001              | -                                  | -                               | -                               | 0.262 (0.165;<br>0.359) <.001  | -                               |
| Interpersonal relationships   | -                                          | -                                  | 0.339 (0.249;<br>0.430) <.001   | -                               | -                              | -                               |
| Work skills                   | -                                          | -                                  | -                               | -                               | 0.180 (0.091;<br>0.270) <.001  | -                               |



| <b>B) TEST sample (n=309)</b> | <b>Real-life functioning domains at follow-up</b> |                 |                                    |                             |                            |                            |
|-------------------------------|---------------------------------------------------|-----------------|------------------------------------|-----------------------------|----------------------------|----------------------------|
|                               | <b>Everyday life skills</b>                       |                 | <b>Interpersonal relationships</b> |                             | <b>SLOF Work skills</b>    |                            |
| <b>Baseline variable</b>      | Direct effect                                     | Indirect effect | Direct effect                      | Indirect effect             | Direct effect              | Indirect effect            |
| Avolition                     | -                                                 | -               | -0.129 (-0.218; -0.041) .004       |                             | -                          | -                          |
| Disorganization dimension     | -                                                 | -               | -                                  | -0.038 (-0.067; -0.009) .01 | -                          | -0.026 (-0.057; 0.005) .10 |
| Positive dimension            | -                                                 | -               | -                                  | -                           | -0.038 (-0.114; 0.037) .32 | -                          |
| Neurocognition                | 0.244 (0.148; 0.339) <.001                        | -               | -                                  | 0.115 (0.048; 0.181) .001   | 0.133 (0.002; 0.264) .05   | 0.077 (-0.006; 0.161) .07  |
| Available incentives          | -                                                 | -               | -                                  | -                           | -                          | -                          |
| Engagement with services      | -                                                 | -               | -                                  | -                           | -                          | -                          |
| Social cognition              | -                                                 | -               | 0.186 (0.084; 0.289) <.001         | -                           | 0.126 (-0.008; 0.260) .07  | -                          |
| Functional capacity           | -                                                 | -               | -                                  | -                           | -                          | -                          |
| Stigma                        | -                                                 | -               | -                                  | -                           | -                          | -                          |
| Resilience                    | -                                                 | -               | -                                  | -                           | -                          | -                          |
| Everyday life skills          | 0.523 (0.442; 0.604) <.001                        | -               | -                                  | -                           | 0.143 (0.045; 0.241) .004  | -                          |
| Interpersonal relationships   | -                                                 | -               | 0.355 (0.265; 0.445) <.001         | -                           | -                          | -                          |
| Work skills                   | -                                                 | -               | -                                  | -                           | 0.332 (0.246; 0.419) <.001 | -                          |

Table cells: standardized regression coefficient; 95% confidence intervals (in brackets); p-value

**eTable 6. Control Analysis for the Site Effect**

**Goodness of fit of the final model in subsamples obtained by excluding sequentially from 1 to 14 centers.**

| <b>Number of centers left out</b> | <b>Residual N</b> | <b>RMSEA</b> | <b>95% CI RMSEA</b> | <b>CFI</b> | <b>TLI</b> |
|-----------------------------------|-------------------|--------------|---------------------|------------|------------|
| 1                                 | 572               | 0.038        | 0.034-0.043         | 0.956      | 0.948      |
| 2                                 | 532               | 0.038        | 0.033-0.043         | 0.957      | 0.949      |
| 3                                 | 494               | 0.036        | 0.031-0.042         | 0.960      | 0.952      |
| 4                                 | 460               | 0.039        | 0.033-0.045         | 0.954      | 0.946      |
| 5                                 | 428               | 0.039        | 0.033-0.045         | 0.955      | 0.947      |
| 6                                 | 398               | 0.038        | 0.031-0.044         | 0.958      | 0.950      |
| 7                                 | 369               | 0.037        | 0.031-0.044         | 0.958      | 0.950      |
| 8                                 | 340               | 0.038        | 0.030-0.045         | 0.958      | 0.950      |
| 9                                 | 312               | 0.038        | 0.030-0.046         | 0.956      | 0.947      |
| 10                                | 284               | 0.041        | 0.032-0.048         | 0.949      | 0.939      |
| 11                                | 258               | 0.038        | 0.028-0.046         | 0.954      | 0.946      |
| 12                                | 232               | 0.038        | 0.028-0.048         | 0.954      | 0.946      |
| 13                                | 206               | 0.039        | 0.028-0.049         | 0.952      | 0.943      |
| 14                                | 180               | 0.043        | 0.031-0.053         | 0.944      | 0.933      |

RMSEA=root mean square error of approximation; CI=confidence intervals; CFI=comparative fit index; TLI=Tucker-Lewis index

**eTable 7. Multiple Linear Regression of Work Skills at Follow-up on Variables Used in the Structural Equation Model and Physical and Psychiatric Comorbidities**

|                                  | <b>SLOF Work skills at follow-up</b>                |                   |                |                                                      |                   |                |
|----------------------------------|-----------------------------------------------------|-------------------|----------------|------------------------------------------------------|-------------------|----------------|
|                                  | <b>FULL MODEL</b><br>(n=580, R <sup>2</sup> =0.413) |                   |                | <b>FINAL MODEL</b><br>(n=599, R <sup>2</sup> =0.400) |                   |                |
| <b>Baseline variables</b>        | <b>Coef.</b>                                        | <b>95% C.I.</b>   | <b>p-value</b> | <b>Coef.</b>                                         | <b>95% C.I.</b>   | <b>p-value</b> |
| SLOF Work skills                 | 0.292                                               | 0.207;<br>0.377   | <.001          | 0.296                                                | 0.215;<br>0.377   | <.001          |
| SLOF Interpersonal relationships | -0.022                                              | -0.102;<br>0.059  | .59            |                                                      |                   |                |
| SLOF Everyday life skills        | 0.135                                               | 0.067;<br>0.203   | <.001          | 0.151                                                | 0.089;<br>0.212   | <.001          |
| Disorganization dimension        | -0.483                                              | -1.031;<br>-0.066 | .08            |                                                      |                   |                |
| Positive dimension               | -0.408                                              | -0.879;<br>0.063  | .00            | -0.630                                               | -1.052;<br>-0.207 | .004           |
| Avolition                        | 0.016                                               | -0.457;<br>0.489  | .95            |                                                      |                   |                |
| Neurocognition                   | 0.614                                               | 0.038;<br>1.190   | .04            | 0.830                                                | 0.312;<br>1.348   | .002           |
| Social cognition                 | 0.787                                               | 0.317;<br>1.258   | .001           | 0.803                                                | 0.358;<br>1.249   | <.001          |
| Functional capacity              | 0.065                                               | -0.265;<br>0.395  | .70            |                                                      |                   |                |
| Incentives                       | -0.114                                              | -0.521;<br>0.293  | .58            |                                                      |                   |                |
| Stigma                           | 0.473                                               | 0.001;<br>0.946   | .05            | 0.491                                                | 0.028;<br>0.955   | .04            |
| Resilience                       | 0.873                                               | 0.239;<br>1.507   | .007           | 0.764                                                | 0.150;<br>1.378   | .01            |
| Engagement with services         | -0.436                                              | -0.867;<br>-0.005 | .05            |                                                      |                   |                |
| Any physical comorbidity         | -0.003                                              | -0.982;<br>0.977  | .99            | -0.058                                               | -1.015;<br>0.898  | .90            |

|                             |        |                  |       |       |                  |       |
|-----------------------------|--------|------------------|-------|-------|------------------|-------|
| Any psychiatric comorbidity | 0.378  | -0.587;<br>1.342 | .44   | 0.166 | -0.773;<br>1.106 | .73   |
| Constant                    | 10.223 | 6.910;<br>13.536 | <.001 | 9.154 | 6.238;<br>12.071 | <.001 |

SLOF=Specific Level of Functioning Scale

**eTable 8. Multiple Linear Regression of Everyday Life Skills at Follow-up on Variables Used in the Structural Equation Model and Physical and Psychiatric Comorbidities**

|                                  | SLOF Everyday life skills at follow-up       |                  |         |                                               |                  |         |
|----------------------------------|----------------------------------------------|------------------|---------|-----------------------------------------------|------------------|---------|
|                                  | FULL MODEL<br>(n=576, R <sup>2</sup> =0.480) |                  |         | FINAL MODEL<br>(n=580, R <sup>2</sup> =0.472) |                  |         |
| Baseline variables               | Coef.                                        | 95%<br>C.I.      | p-value | Coef.                                         | 95%<br>C.I.      | p-value |
| SLOF Everyday life skills        | 0.552                                        | 0.453;<br>0.651  | <.001   | 0.596                                         | 0.514;<br>0.678  | <.001   |
| SLOF Interpersonal relationships | 0.044                                        | -0.073;<br>0.160 | .46     |                                               |                  |         |
| SLOF Work skills                 | 0.048                                        | -0.076;<br>0.173 | .45     |                                               |                  |         |
| Disorganization dimension        | -0.463                                       | -1.261;<br>0.334 | .25     |                                               |                  |         |
| Positive dimension               | 0.086                                        | -0.595;<br>0.767 | .80     |                                               |                  |         |
| Avolition                        | 0.367                                        | -0.320;<br>1.053 | .29     |                                               |                  |         |
| Neurocognition                   | 1.830                                        | 0.995;<br>2.665  | <.001   | 2.100                                         | 1.333;<br>2.867  | <.001   |
| Social cognition                 | 0.331                                        | -0.351;<br>1.013 | .34     |                                               |                  |         |
| Functional capacity              | 0.421                                        | -0.058;<br>0.900 | .08     | 0.536                                         | 0.076;<br>0.997  | .02     |
| Incentives                       | 0.570                                        | -0.022;<br>1.161 | .06     | 0.571                                         | -0.005;<br>1.147 | .05     |
| Stigma                           | 0.261                                        | -0.424;<br>0.945 | .45     |                                               |                  |         |
| Resilience                       | 0.662                                        | -0.257;<br>1.580 | .16     |                                               |                  |         |
| Engagement with services         | -0.326                                       | -0.952;<br>0.299 | .31     |                                               |                  |         |

|                             |        |                   |       |        |                   |       |
|-----------------------------|--------|-------------------|-------|--------|-------------------|-------|
| Any physical comorbidity    | -0.668 | -2.091;<br>0.754  | .36   | -0.645 | -2.045;<br>0.755  | .37   |
| Any psychiatric comorbidity | 0.571  | -0.825;<br>1.967  | .44   | 0.479  | -0.894;<br>1.853  | .49   |
| Constant                    | 21.134 | 16.335;<br>25.933 | <.001 | 21.221 | 16.853;<br>25.589 | <.001 |

SLOF=Specific Level of Functioning Scale

**eTable 9. Multiple Linear Regression of Interpersonal Relationships at Follow-up on Variables Used in the Structural Equation Model and Physical and Psychiatric Comorbidities**

|                                  | SLOF Interpersonal relationships at follow-up |                   |         |                                               |                   |         |
|----------------------------------|-----------------------------------------------|-------------------|---------|-----------------------------------------------|-------------------|---------|
|                                  | FULL MODEL<br>(n=580, R <sup>2</sup> =0.282)  |                   |         | FINAL MODEL<br>(n=608, R <sup>2</sup> =0.276) |                   |         |
| Baseline variables               | Coef.                                         | 95%<br>C.I.       | p-value | Coef.                                         | 95%<br>C.I.       | p-value |
| SLOF Interpersonal relationships | 0.333                                         | 0.244;<br>0.419   | <.001   | 0.355                                         | 0.274;<br>0.432   | <.001   |
| SLOF Everyday life skills        | -0.008                                        | -0.083;<br>0.066  | .83     |                                               |                   |         |
| SLOF Work skills                 | 0.077                                         | -0.015;<br>0.169  | .10     |                                               |                   |         |
| Disorganization dimension        | -0.147                                        | -0.750;<br>0.440  | .63     |                                               |                   |         |
| Positive dimension               | -0.381                                        | -0.897;<br>0.124  | .14     | -0.524                                        | -0.972;<br>-0.093 | .02     |
| Avolition                        | -0.743                                        | -1.251;<br>-0.225 | .005    | -0.797                                        | -1.262;<br>-0.316 | .001    |
| Neurocognition                   | 0.509                                         | -0.107;<br>1.141  | .11     |                                               |                   |         |
| Social cognition                 | 0.731                                         | 0.236;<br>1.256   | .005    | 0.974                                         | 0.579;<br>1.388   | <.001   |
| Functional capacity              | -0.104                                        | -0.473;<br>0.243  | .57     |                                               |                   |         |
| Incentives                       | 0.279                                         | -0.155;<br>0.727  | .22     |                                               |                   |         |
| Stigma                           | 0.571                                         | 0.077;<br>1.107   | .03     | 0.604                                         | 0.124;<br>1.119   | .02     |
| Resilience                       | 0.977                                         | 0.296;<br>1.668   | .005    | 0.981                                         | 0.323;<br>1.650   | .004    |
| Engagement with services         | -0.076                                        | -0.553;<br>0.381  | .75     |                                               |                   |         |

|                             |            |                   |       |        |                   |       |
|-----------------------------|------------|-------------------|-------|--------|-------------------|-------|
| Any physical comorbidity    | 0.565      | -0.530;<br>1.595  | .30   | 0.383  | -0.649;<br>1.359  | .45   |
| Any psychiatric comorbidity | 0.689      | -0.102;<br>2.084  | .20   | 0.707  | -0.141;<br>1.960  | .17   |
| Constant                    | 14.50<br>1 | 10.945;<br>18.132 | <.001 | 15.110 | 13.157;<br>17.129 | <.001 |

SLOF=Specific Level of Functioning Scale



**eTable 10. Initial Latent Change Score Model**

| Baseline measures           | Estimated latent change score                                         |                                                                                 |                                                             |                                                                  |                                                                      |
|-----------------------------|-----------------------------------------------------------------------|---------------------------------------------------------------------------------|-------------------------------------------------------------|------------------------------------------------------------------|----------------------------------------------------------------------|
|                             | Δ Everyday life skills<br>(11.116; p<0.001;<br>R <sup>2</sup> =0.200) | Δ Interpersonal<br>relationships<br>(12.873; p<0.001;<br>R <sup>2</sup> =0.339) | Δ Work skills<br>(2.369; p=0.210;<br>R <sup>2</sup> =0.360) | Δ Social cognition<br>(7.450; p<0.001;<br>R <sup>2</sup> =0.158) | Δ Functional capacity<br>(-2.216; p=0.552;<br>R <sup>2</sup> =0.229) |
| Avolition                   | 0.015 (-0.044; 0.074) .63                                             | -0.092 (-0.136; -0.049)<br><.001                                                | -0.019 (-0.059; 0.021) .35                                  |                                                                  |                                                                      |
| Positive dimension          | 0.016 (-0.109; 0.141) .80                                             | -0.064 (-0.159; 0.031) .19                                                      | -0.085 (-0.165; 0.005) .04                                  |                                                                  |                                                                      |
| Neurocognition              | 0.207 (0.021; 0.392) .03                                              | -0.032 (-0.154; 0.090) .61                                                      | 0.045 (-0.071; 0.160) .45                                   | 0.120 (0.001; 0.239) .05                                         | 1.060 (0.722; 1.399)<br><.001                                        |
| Social cognition            | 0.109 (-0.055; 0.274) .19                                             | 0.182 (0.063; 0.301) .003                                                       | 0.213 (0.106; 0.320)<br><.001                               | -0.272 (-0.416; -0.128)<br><.001                                 |                                                                      |
| Functional capacity         | 0.035 (-0.001; 0.070) .06                                             | -0.005 (-0.030; 0.020) .69                                                      | 0.005 (-0.017; 0.028) .64                                   |                                                                  | -0.558 (-0.646; -0.471)<br><.001                                     |
| Everyday life skills        | -0.507 (-0.614; -0.400)<br><.001                                      | -0.050 (-0.113; 0.014) .15                                                      | 0.101 (0.045; 0.157)<br><.001                               | 0.022 (-0.038; 0.083)<br>.47                                     | 0.509 (0.300; 0.718)<br><.001                                        |
| Interpersonal relationships | 0.005 (-0.097; 0.106) .93                                             | -0.687 (-0.770; -0.603)<br><.001                                                | -0.029 (-0.100; 0.041) .42                                  | 0.008 (-0.056; 0.072)<br>.81                                     | 0.000 (-0.233; 0.233)<br>.99                                         |
| Work skills                 | 0.046 (-0.063; 0.154) .41                                             | 0.059 (-0.034; 0.151) .21                                                       | -0.707 (-0.791; -0.622)<br><.001                            | 0.006 (-0.063; 0.075)<br>.86                                     | 0.001 (-0.253; 0.254)<br>.99                                         |

Table column headings: Estimated latent change score from baseline to 4-year follow-up; in parentheses: Δ=estimated change; p-value and explained variance R<sup>2</sup> of the latent change. Table cells: regression coefficients; 95% confidence intervals (in brackets); p-values

## eReferences

1. Galderisi S, Rossi A, Rocca P, et al. The influence of illness-related variables, personal resources and context-related factors on real-life functioning of people with schizophrenia. *World Psychiatry*. 2014;13(3):275-287. doi10.1002/wps.20167
2. Kay SR, Fiszbein A, Opler LA. The positive and negative syndrome scale (PANSS) for schizophrenia. *Schizophr Bull*. 1987;13(2):261-276. doi10.1093/schbul/13.2.261
3. Wallwork RS, Fortgang R, Hashimoto R, Weinberger DR, Dickinson D. Searching for a consensus five-factor model of the Positive and Negative Syndrome Scale for schizophrenia. *Schizophr Res*. 2012;137(1-3):246-250. doi10.1016/j.schres.2012.01.031
4. Kirkpatrick B, Strauss GP, Nguyen L, et al. The brief negative symptom scale: psychometric properties. *Schizophr Bull*. 2011;37(2):300-305. doi10.1093/schbul/sbq059
5. Mucci A, Galderisi S, Merlotti E, et al. The Brief Negative Symptom Scale (BNSS): independent validation in a large sample of Italian patients with schizophrenia. *Eur Psychiatry*. 2015;30(5):641-647. doi10.1016/j.eurpsy.2015.01.014
6. Addington D, Addington J, Maticka-Tyndale E. Assessing depression in schizophrenia: the Calgary Depression Scale. *Br J Psychiatry*. 1993; 163(S22):S39-44.
7. Gerlach J, Korsgaard S, Clemmesen P, et al. The St. Hans Rating Scale for extrapyramidal syndromes: reliability and validity. *Acta Psychiatr Scand*. 1993;87(4):244-252. doi10.1111/j.1600-0447.1993.tb03366.x

8. Nuechterlein KH, Green MF, Kern RS, et al. The MATRICS Consensus Cognitive Battery. part 1: test selection, reliability, and validity. *Am J Psychiatry*. 2008;165(2):203-213. doi10.1176/appi.ajp.2007.07010042
9. Kern RS, Nuechterlein KH, Green MF, et al. The MATRICS Consensus Cognitive Battery. part 2: co-norming and standardization. *Am J Psychiatry*. 2008;165(2):214-220. doi10.1176/ appi.ajp.2007.07010043
10. Kerr SL, Neale JM. Emotion perception in schizophrenia: specific deficit or further evidence of generalized poor performance? *J Abnorm Psychol*. 1993;102(2):312-318. doi10.1037//0021-843x.102.2.312
11. McDonald S, Bornhofen C, Shum D, Long E, Saunders C, Neulinger K. Reliability and validity of The Awareness of Social Inference Test (TASIT): a clinical test of social perception. *Disabil Rehabil*. 2006;28(24):1529-1542. doi10.1080/09638280600646185
12. First MB, Spitzer RL, Gibbon M, Williams JBW. *Structured clinical interview for DSM-IV-TR axis I disorders, research version, patient edition (SCID-I/P)*. New York: Biometrics Research, New York State Psychiatric Institute, 2002.
13. State of Illinois Department of Human Services. *Specific Level of Functioning Assessment and Physical Health Inventory*. IL462-1215 (R-9-08).
14. Friborg O, Hjemdal O, Rosenvinge JH, Martinussen M. A new rating scale for adult resilience: what are the central protective resources behind healthy adjustment? *Int J Methods Psychiatr Res*. 2003;12(2):65-76. doi10.1002/mpr.143

15. Tait L, Birchwood M, Trower P. A new scale (SES) to measure engagement with community mental health services. *J Ment Health*. 2002;11(2):191-198.  
doi10.1080/09638230020023570-2
16. Ritsher JB, Otilingam PG, Grajales M. Internalized stigma of mental illness: psychometric properties of a new measure. *Psychiatry Res*. 2003;121(1):31-49.  
doi10.1016/j.psychres.2003.08.008
17. Mausbach BT, Harvey PD, Goldman SR, Jeste DV, Patterson TL. Development of a brief scale of everyday functioning in persons with serious mental illness. *Schizophr Bull*. 2007;33(6):1364-1372. doi10.1093/schbul/sbm014
18. Mucci A, Rucci P, Rocca P, et al. The Specific Level of Functioning Scale: construct validity, internal consistency and factor structure in a large Italian sample of people with schizophrenia living in the community. *Schizophr Res*. 2014;159(1):144-150.  
doi10.1016/j.schres.2014.07.044
19. MacKinnon D. *Introduction to Statistical Mediation Analysis*. New York, NY: Lawrence Erlbaum Associates. Taylor & Francis Group. 2008:1-489.
20. Kievit RA, Brandmaier AM, Ziegler G, et al. Developmental cognitive neuroscience using latent change score models: a tutorial and applications. *Dev Cogn Neurosci*. 2018;33(1):99-117. doi10.1016/j.dcn.2017.11.007
21. Cohen J. A power primer. *Psychol Bull*. 1992;112(1):155-159. doi10.1037//0033-2909.112.1.155
- 22.
