# Supplementary material
Source: PubMed Central journal article supplement (PMC7876615)
Supplement: jamapsychiatry-e204614-s002.pdf [file jamapsychiatry-e204614-s002.pdf]

| <b>Group Name: Italian Network for Research on Psychoses</b> |            |                       |                  |                                           |                                          |                                                                                                        |                                                                                            |
|--------------------------------------------------------------|------------|-----------------------|------------------|-------------------------------------------|------------------------------------------|--------------------------------------------------------------------------------------------------------|--------------------------------------------------------------------------------------------|
| First Name and Middle Initial(s)*                            | Last Name* | Suffix (eg, Jr, III)* | Academic Degrees | Institution                               | Location (city, state/province, country) | Role or Contribution, eg, chair, principal investigator                                                | Group (if more than 1 Group listed in the byline) and/or Subgroup (eg, Steering Committee) |
| Giuseppe                                                     | Piegari    |                       | MD               | University of Campania "Luigi Vanvitelli" | Naples, Italy                            | Recruitment of patients, clinical, neuropsychological and functional assessments, data quality control | Not applicable                                                                             |
| Carmen                                                       | Aiello     |                       | MD               | University of Campania "Luigi Vanvitelli" | Naples, Italy                            | Recruitment of patients, clinical, neuropsychological and functional assessments, data quality control | Not applicable                                                                             |
| Francesco                                                    | Brando     |                       | MD               | University of Campania "Luigi Vanvitelli" | Naples, Italy                            | Recruitment of patients, clinical, neuropsychological and functional assessments, data quality control | Not applicable                                                                             |
| Luigi                                                        | Giuliani   |                       | MD               | University of Campania "Luigi Vanvitelli" | Naples, Italy                            | Recruitment of patients, clinical, neuropsychological and functional assessments, data quality control | Not applicable                                                                             |
| Davide                                                       | Palumbo    |                       | MD               | University of Campania "Luigi Vanvitelli" | Naples, Italy                            | Recruitment of patients, clinical, neuropsychological and functional assessments, data quality control | Not applicable                                                                             |

## Supplemental Online Content: Nonauthor Collaborators

| First Name and Middle Initial(s)* | Last Name* | Suffix (eg, Jr, III)* | Academic Degrees | Institution                               | Location (city, state/province, country) | Role or Contribution, eg, chair, principal investigator                                                | Group (if more than 1 Group listed in the byline) and/or Subgroup (eg, Steering Committee) |
|-----------------------------------|------------|-----------------------|------------------|-------------------------------------------|------------------------------------------|--------------------------------------------------------------------------------------------------------|--------------------------------------------------------------------------------------------|
| Chiara                            | Coccia     |                       | MD               | University of Campania "Luigi Vanvitelli" | Naples, Italy                            | Recruitment of patients, clinical, neuropsychological and functional assessments, data quality control | Not applicable                                                                             |
| Marco                             | Papalino   |                       | MD               | University of Bari                        | Bari, Italy                              | Recruitment of patients, clinical, neuropsychological and functional assessments, data quality control | Not applicable                                                                             |
| Vitalba                           | Calia      |                       | MD               | University of Bari                        | Bari, Italy                              | Recruitment of patients, clinical, neuropsychological and functional assessments, data quality control | Not applicable                                                                             |
| Raffaella                         | Romano     |                       | PhD              | University of Bari                        | Bari, Italy                              | Recruitment of patients, clinical, neuropsychological and functional assessments, data quality control | Not applicable                                                                             |
| Stefano                           | Barlati    |                       | MD               | University of Brescia                     | Brescia, Italy                           | Recruitment of patients, clinical, neuropsychological and functional assessments, data quality control | Not applicable                                                                             |

## Supplemental Online Content: Nonauthor Collaborators

| First Name and Middle Initial(s)* | Last Name*            | Suffix (eg, Jr, III)* | Academic Degrees | Institution            | Location (city, state/province, country) | Role or Contribution, eg, chair, principal investigator                                                | Group (if more than 1 Group listed in the byline) and/or Subgroup (eg, Steering Committee) |
|-----------------------------------|-----------------------|-----------------------|------------------|------------------------|------------------------------------------|--------------------------------------------------------------------------------------------------------|--------------------------------------------------------------------------------------------|
| Giacomo                           | Deste                 |                       | MD               | University of Brescia  | Brescia, Italy                           | Recruitment of patients, clinical, neuropsychological and functional assessments, data quality control | Not applicable                                                                             |
| Paolo                             | Valsecchi             |                       | MD               | University of Brescia  | Brescia, Italy                           | Recruitment of patients, clinical, neuropsychological and functional assessments, data quality control | Not applicable                                                                             |
| Federica                          | Pinna                 |                       | Prof             | University of Cagliari | Cagliari, Italy                          | Recruitment of patients, clinical, neuropsychological and functional assessments, data quality control | Not applicable                                                                             |
| Alice                             | Lai                   |                       | MD               | University of Cagliari | Cagliari, Italy                          | Recruitment of patients, clinical, neuropsychological and functional assessments, data quality control | Not applicable                                                                             |
| Silvia                            | Lostia di Santa Sofia |                       | MD               | University of Cagliari | Cagliari, Italy                          | Recruitment of patients, clinical, neuropsychological and functional assessments, data quality control | Not applicable                                                                             |

## Supplemental Online Content: Nonauthor Collaborators

| First Name and Middle Initial(s)* | Last Name* | Suffix (eg, Jr, III)* | Academic Degrees | Institution           | Location (city, state/province, country) | Role or Contribution, eg, chair, principal investigator                                                | Group (if more than 1 Group listed in the byline) and/or Subgroup (eg, Steering Committee) |
|-----------------------------------|------------|-----------------------|------------------|-----------------------|------------------------------------------|--------------------------------------------------------------------------------------------------------|--------------------------------------------------------------------------------------------|
| Maria Salvina                     | Signorelli |                       | MD               | University of Catania | Catania, Italy                           | Recruitment of patients, clinical, neuropsychological and functional assessments, data quality control | Not applicable                                                                             |
| Laura                             | Fusar Poli |                       | MD               | University of Catania | Catania, Italy                           | Recruitment of patients, clinical, neuropsychological and functional assessments, data quality control | Not applicable                                                                             |
| Teresa                            | Surace     |                       | MD               | University of Catania | Catania, Italy                           | Recruitment of patients, clinical, neuropsychological and functional assessments, data quality control | Not applicable                                                                             |
| Giovanni                          | Martinotti |                       | MD               | University of Chieti  | Chieti, Italy                            | Recruitment of patients, clinical, neuropsychological and functional assessments, data quality control | Not applicable                                                                             |
| Chiara                            | Montemitro |                       | MD               | University of Chieti  | Chieti, Italy                            | Recruitment of patients, clinical, neuropsychological and functional assessments, data quality control | Not applicable                                                                             |

## Supplemental Online Content: Nonauthor Collaborators

| First Name and Middle Initial(s)* | Last Name* | Suffix (eg, Jr, III)* | Academic Degrees | Institution          | Location (city, state/province, country) | Role or Contribution, eg, chair, principal investigator                                                | Group (if more than 1 Group listed in the byline) and/or Subgroup (eg, Steering Committee) |
|-----------------------------------|------------|-----------------------|------------------|----------------------|------------------------------------------|--------------------------------------------------------------------------------------------------------|--------------------------------------------------------------------------------------------|
| Silvia                            | Fraticelli |                       | PsyD             | University of Chieti | Chieti, Italy                            | Recruitment of patients, clinical, neuropsychological and functional assessments, data quality control | Not applicable                                                                             |
| Mario                             | Altamura   |                       | Prof             | University of Foggia | Foggia, Italy                            | Recruitment of patients, clinical, neuropsychological and functional assessments, data quality control | Not applicable                                                                             |
| Eleonora                          | Angelini   |                       | MD               | University of Foggia | Foggia, Italy                            | Recruitment of patients, clinical, neuropsychological and functional assessments, data quality control | Not applicable                                                                             |
| Antonella                         | Elia       |                       | MD               | University of Foggia | Foggia, Italy                            | Recruitment of patients, clinical, neuropsychological and functional assessments, data quality control | Not applicable                                                                             |
| Pietro                            | Calcagno   |                       | MD               | University of Genoa  | Genoa, Italy                             | Recruitment of patients, clinical, neuropsychological and functional assessments, data quality control | Not applicable                                                                             |

## Supplemental Online Content: Nonauthor Collaborators

| First Name and Middle Initial(s)* | Last Name*      | Suffix (eg, Jr, III)* | Academic Degrees | Institution            | Location (city, state/province, country) | Role or Contribution, eg, chair, principal investigator                                                | Group (if more than 1 Group listed in the byline) and/or Subgroup (eg, Steering Committee) |
|-----------------------------------|-----------------|-----------------------|------------------|------------------------|------------------------------------------|--------------------------------------------------------------------------------------------------------|--------------------------------------------------------------------------------------------|
| Martino                           | Belvederi Murri |                       | MD               | University of Genoa    | Genoa, Italy                             | Recruitment of patients, clinical, neuropsychological and functional assessments, data quality control | Not applicable                                                                             |
| Simone                            | Cattedra        |                       | MD               | University of Genoa    | Genoa, Italy                             | Recruitment of patients, clinical, neuropsychological and functional assessments, data quality control | Not applicable                                                                             |
| Francesca                         | Pacitti         |                       | MD               | University of L'Aquila | L'Aquila, Italy                          | Recruitment of patients, clinical, neuropsychological and functional assessments, data quality control | Not applicable                                                                             |
| Dalila                            | Talevi          |                       | MD               | University of L'Aquila | L'Aquila, Italy                          | Recruitment of patients, clinical, neuropsychological and functional assessments, data quality control | Not applicable                                                                             |
| Valentina                         | Socci           |                       | PhD              | University of L'Aquila | L'Aquila, Italy                          | Recruitment of patients, clinical, neuropsychological and functional assessments, data quality control | Not applicable                                                                             |

## Supplemental Online Content: Nonauthor Collaborators

| First Name and Middle Initial(s)* | Last Name*     | Suffix (eg, Jr, III)* | Academic Degrees | Institution                      | Location (city, state/province, country) | Role or Contribution, eg, chair, principal investigator                                                | Group (if more than 1 Group listed in the byline) and/or Subgroup (eg, Steering Committee) |
|-----------------------------------|----------------|-----------------------|------------------|----------------------------------|------------------------------------------|--------------------------------------------------------------------------------------------------------|--------------------------------------------------------------------------------------------|
| Laura                             | Giusti         |                       | PhD              | University of L'Aquila           | L'Aquila, Italy                          | Recruitment of patients, clinical, neuropsychological and functional assessments, data quality control | Not applicable                                                                             |
| Anna                              | Salza          |                       | PhD              | University of L'Aquila           | L'Aquila, Italy                          | Recruitment of patients, clinical, neuropsychological and functional assessments, data quality control | Not applicable                                                                             |
| Silvia                            | Mammarella     |                       | PhD              | University of L'Aquila           | L'Aquila, Italy                          | Recruitment of patients, clinical, neuropsychological and functional assessments, data quality control | Not applicable                                                                             |
| Andrea                            | de Bartolomeis |                       | Prof             | University of Naples Federico II | Naples, Italy                            | Recruitment of patients, clinical, neuropsychological and functional assessments, data quality control | Not applicable                                                                             |
| Angela                            | Favaro         |                       | Prof             | University of Padua              | Padua, Italy                             | Recruitment of patients, clinical, neuropsychological and functional assessments, data quality control | Not applicable                                                                             |

## Supplemental Online Content: Nonauthor Collaborators

| First Name and Middle Initial(s)* | Last Name* | Suffix (eg, Jr, III)* | Academic Degrees | Institution         | Location (city, state/province, country) | Role or Contribution, eg, chair, principal investigator                                                | Group (if more than 1 Group listed in the byline) and/or Subgroup (eg, Steering Committee) |
|-----------------------------------|------------|-----------------------|------------------|---------------------|------------------------------------------|--------------------------------------------------------------------------------------------------------|--------------------------------------------------------------------------------------------|
| Enrico                            | Collantoni |                       | MD               | University of Padua | Padua, Italy                             | Recruitment of patients, clinical, neuropsychological and functional assessments, data quality control | Not applicable                                                                             |
| Paolo                             | Meneguzzo  |                       | MD               | University of Padua | Padua, Italy                             | Recruitment of patients, clinical, neuropsychological and functional assessments, data quality control | Not applicable                                                                             |
| Matteo                            | Tonna      |                       | MD               | University of Parma | Parma, Italy                             | Recruitment of patients, clinical, neuropsychological and functional assessments, data quality control | Not applicable                                                                             |
| Paolo                             | Ossola     |                       | MD               | University of Parma | Parma, Italy                             | Recruitment of patients, clinical, neuropsychological and functional assessments, data quality control | Not applicable                                                                             |
| Maria Lidia                       | Gerra      |                       | MD               | University of Parma | Parma, Italy                             | Recruitment of patients, clinical, neuropsychological and functional assessments, data quality control | Not applicable                                                                             |



## Supplemental Online Content: Nonauthor Collaborators

| First Name and Middle Initial(s)* | Last Name* | Suffix (eg, Jr, III)* | Academic Degrees | Institution                    | Location (city, state/province, country) | Role or Contribution, eg, chair, principal investigator                                                | Group (if more than 1 Group listed in the byline) and/or Subgroup (eg, Steering Committee) |
|-----------------------------------|------------|-----------------------|------------------|--------------------------------|------------------------------------------|--------------------------------------------------------------------------------------------------------|--------------------------------------------------------------------------------------------|
| Carla                             | Gramaglia  |                       | MD               | University of Eastern Piedmont | Novara, Italy                            | Recruitment of patients, clinical, neuropsychological and functional assessments, data quality control | Not applicable                                                                             |
| Valeria                           | Binda      |                       | MD               | University of Eastern Piedmont | Novara, Italy                            | Recruitment of patients, clinical, neuropsychological and functional assessments, data quality control | Not applicable                                                                             |
| Eleonora                          | Gambaro    |                       | MD               | University of Eastern Piedmont | Novara, Italy                            | Recruitment of patients, clinical, neuropsychological and functional assessments, data quality control | Not applicable                                                                             |
| Claudia                           | Carmassi   |                       | MD               | University of Pisa             | Pisa, Italy                              | Recruitment of patients, clinical, neuropsychological and functional assessments, data quality control | Not applicable                                                                             |
| Barbara                           | Carpita    |                       | MD               | University of Pisa             | Pisa, Italy                              | Recruitment of patients, clinical, neuropsychological and functional assessments, data quality control | Not applicable                                                                             |

## Supplemental Online Content: Nonauthor Collaborators

| First Name and Middle Initial(s)* | Last Name* | Suffix (eg, Jr, III)* | Academic Degrees | Institution                 | Location (city, state/province, country) | Role or Contribution, eg, chair, principal investigator                                                | Group (if more than 1 Group listed in the byline) and/or Subgroup (eg, Steering Committee) |
|-----------------------------------|------------|-----------------------|------------------|-----------------------------|------------------------------------------|--------------------------------------------------------------------------------------------------------|--------------------------------------------------------------------------------------------|
| Ivan Mirko                        | Cremonese  |                       | MD               | University of Pisa          | Pisa, Italy                              | Recruitment of patients, clinical, neuropsychological and functional assessments, data quality control | Not applicable                                                                             |
| Giulio                            | Corrivetti |                       | MD               | Department of Mental Health | Salerno                                  | Recruitment of patients, clinical, neuropsychological and functional assessments, data quality control | Not applicable                                                                             |
| Giammarco                         | Cascino    |                       | MD               | Department of Mental Health | Salerno                                  | Recruitment of patients, clinical, neuropsychological and functional assessments, data quality control | Not applicable                                                                             |
| Gianfranco                        | Del Buono  |                       | MD               | Department of Mental Health | Salerno                                  | Recruitment of patients, clinical, neuropsychological and functional assessments, data quality control | Not applicable                                                                             |
| Roberto                           | Brugnoli   |                       | MD               | Sapienza University of Rome | Rome, Italy                              | Recruitment of patients, clinical, neuropsychological and functional assessments, data quality control | Not applicable                                                                             |

## Supplemental Online Content: Nonauthor Collaborators

| First Name and Middle Initial(s)* | Last Name*  | Suffix (eg, Jr, III)* | Academic Degrees | Institution                 | Location (city, state/province, country) | Role or Contribution, eg, chair, principal investigator                                                | Group (if more than 1 Group listed in the byline) and/or Subgroup (eg, Steering Committee) |
|-----------------------------------|-------------|-----------------------|------------------|-----------------------------|------------------------------------------|--------------------------------------------------------------------------------------------------------|--------------------------------------------------------------------------------------------|
| Anna                              | Comparelli  |                       | MD               | Sapienza University of Rome | Rome, Italy                              | Recruitment of patients, clinical, neuropsychological and functional assessments, data quality control | Not applicable                                                                             |
| Valentina                         | Corigliano  |                       | MD               | Sapienza University of Rome | Rome, Italy                              | Recruitment of patients, clinical, neuropsychological and functional assessments, data quality control | Not applicable                                                                             |
| Antonio                           | Buzanca     |                       | MD               | Sapienza University of Rome | Rome, Italy                              | Recruitment of patients, clinical, neuropsychological and functional assessments, data quality control | Not applicable                                                                             |
| Nicoletta                         | Gerardi     |                       | MD               | Sapienza University of Rome | Rome, Italy                              | Recruitment of patients, clinical, neuropsychological and functional assessments, data quality control | Not applicable                                                                             |
| Marianna                          | Frascarelli |                       | MD               | Sapienza University of Rome | Rome, Italy                              | Recruitment of patients, clinical, neuropsychological and functional assessments, data quality control | Not applicable                                                                             |

## Supplemental Online Content: Nonauthor Collaborators

| First Name and Middle Initial(s)* | Last Name* | Suffix (eg, Jr, III)* | Academic Degrees | Institution                    | Location (city, state/province, country) | Role or Contribution, eg, chair, principal investigator                                                | Group (if more than 1 Group listed in the byline) and/or Subgroup (eg, Steering Committee) |
|-----------------------------------|------------|-----------------------|------------------|--------------------------------|------------------------------------------|--------------------------------------------------------------------------------------------------------|--------------------------------------------------------------------------------------------|
| Andrea                            | Fagiolini  |                       | Prof             | University of Siena            | Siena, italy                             | Recruitment of patients, clinical, neuropsychological and functional assessments, data quality control | Not applicable                                                                             |
| Arianna                           | Goracci    |                       | Prof             | University of Siena            | Siena, italy                             | Recruitment of patients, clinical, neuropsychological and functional assessments, data quality control | Not applicable                                                                             |
| Simone                            | Bolognesi  |                       | PhD              | University of Siena            | Siena, italy                             | Recruitment of patients, clinical, neuropsychological and functional assessments, data quality control | Not applicable                                                                             |
| Alberto                           | Siracusano |                       | Prof             | Tor Vergata University of Rome | Rome, Italy                              | Recruitment of patients, clinical, neuropsychological and functional assessments, data quality control | Not applicable                                                                             |
| Giorgio                           | Di Lorenzo |                       | Prof             | Tor Vergata University of Rome | Rome, Italy                              | Recruitment of patients, clinical, neuropsychological and functional assessments, data quality control | Not applicable                                                                             |

## Supplemental Online Content: Nonauthor Collaborators

| First Name and Middle Initial(s)* | Last Name* | Suffix (eg, Jr, III)* | Academic Degrees | Institution                    | Location (city, state/province, country) | Role or Contribution, eg, chair, principal investigator                                                | Group (if more than 1 Group listed in the byline) and/or Subgroup (eg, Steering Committee) |
|-----------------------------------|------------|-----------------------|------------------|--------------------------------|------------------------------------------|--------------------------------------------------------------------------------------------------------|--------------------------------------------------------------------------------------------|
| Michele                           | Ribolsi    |                       | MD               | Tor Vergata University of Rome | Rome, Italy                              | Recruitment of patients, clinical, neuropsychological and functional assessments, data quality control | Not applicable                                                                             |
| Cristiana                         | Montemagni |                       | MD               | University of Turin            | Turin, Italy                             | Recruitment of patients, clinical, neuropsychological and functional assessments, data quality control | Not applicable                                                                             |
| Cecilia                           | Riccardi   |                       | MD               | University of Turin            | Turin, Italy                             | Recruitment of patients, clinical, neuropsychological and functional assessments, data quality control | Not applicable                                                                             |
| Elisa                             | Del Favero |                       | MD               | University of Turin            | Turin, Italy                             | Recruitment of patients, clinical, neuropsychological and functional assessments, data quality control | Not applicable                                                                             |
